# Supplementary material for: The efficacy of oleic acid treatment in passivating MAPbI 3 films
Source: Royal Society of Chemistry journal article supplement (doi:10.1039/d5nr00325c), 2025-01-01
Supplement: d5nr00325c1.pdf [file d5nr00325c1.pdf]

## Supplementary Information

# The Efficacy of Oleic Acid Treatment in Passivating MAPbI<sub>3</sub> Films

*Ghada Abdelmageed<sup>1</sup>, Rashad F Kahwagi<sup>1</sup>, Joelle Korkomaz<sup>1</sup>, Anthony El-Halaby<sup>1</sup>, Adam F G Leontowich<sup>2,3</sup>, Sean Hinds<sup>1</sup>, Ghada I Koleilat<sup>1\*</sup>*

<sup>1</sup>Department of Process Engineering and Applied Science, Dalhousie University, 1360 Barrington Street, Halifax, Nova Scotia, B3H 4R2, Canada.

<sup>2</sup>Canadian Light Source Inc., 44 Innovation Boulevard, Saskatoon, SK, S7N 2V3, Canada.

<sup>3</sup>Department of Chemistry, University of Saskatchewan, Saskatoon, SK, S7N 5C9, Canada.

\*Corresponding Author: E-mail: [ghada.koleilat@dal.ca](mailto:ghada.koleilat@dal.ca)

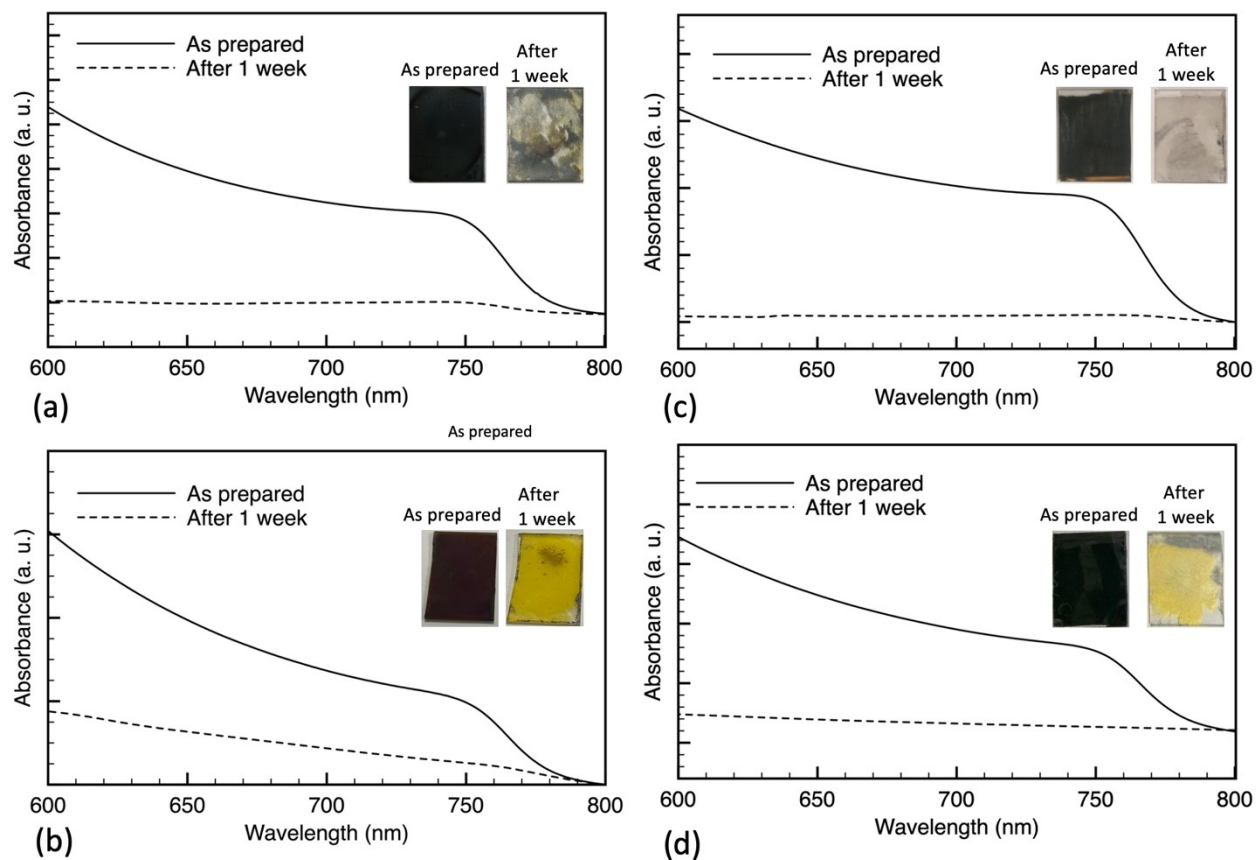

Figure (S1): Absorbance spectra of untreated control MAPbI<sub>3</sub> films prepared via different deposition methods and aged at  $\approx 76\%$  RH : (a) SC-1, (b) SC-2, (c) BC-1, (d) BC-2. Insets show the photos of the films before and after the exposure.

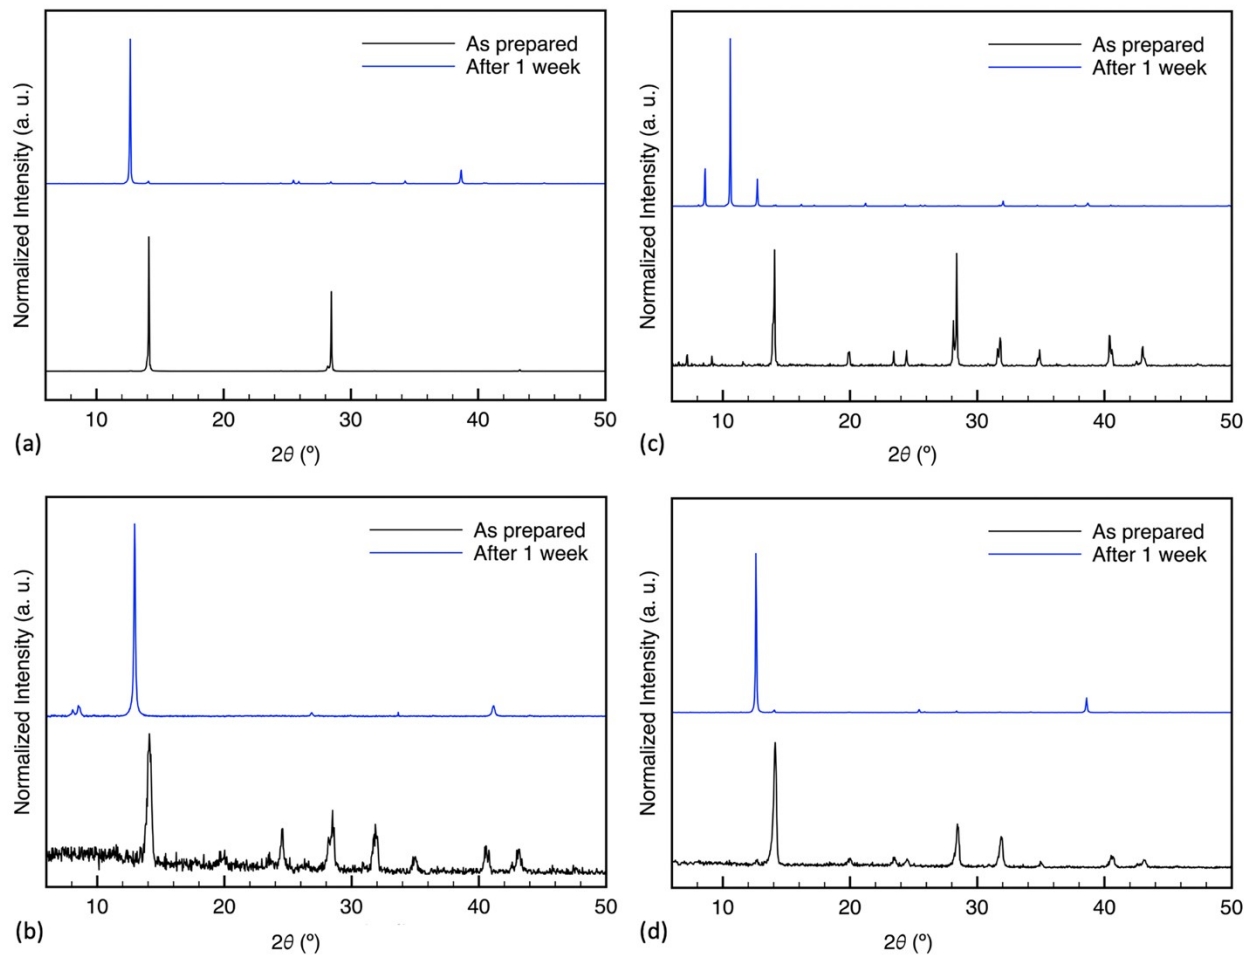

Figure (S2): X-ray diffraction pattern ( $\lambda = 1.5406 \text{ \AA}$ ) of untreated  $\text{MAPbI}_3$  films prepared via different deposition methods and aged at  $\sim 76\% \text{ RH}$ : (a) SC-1, (b) SC-2, (c) BC-1, (d) BC-2.

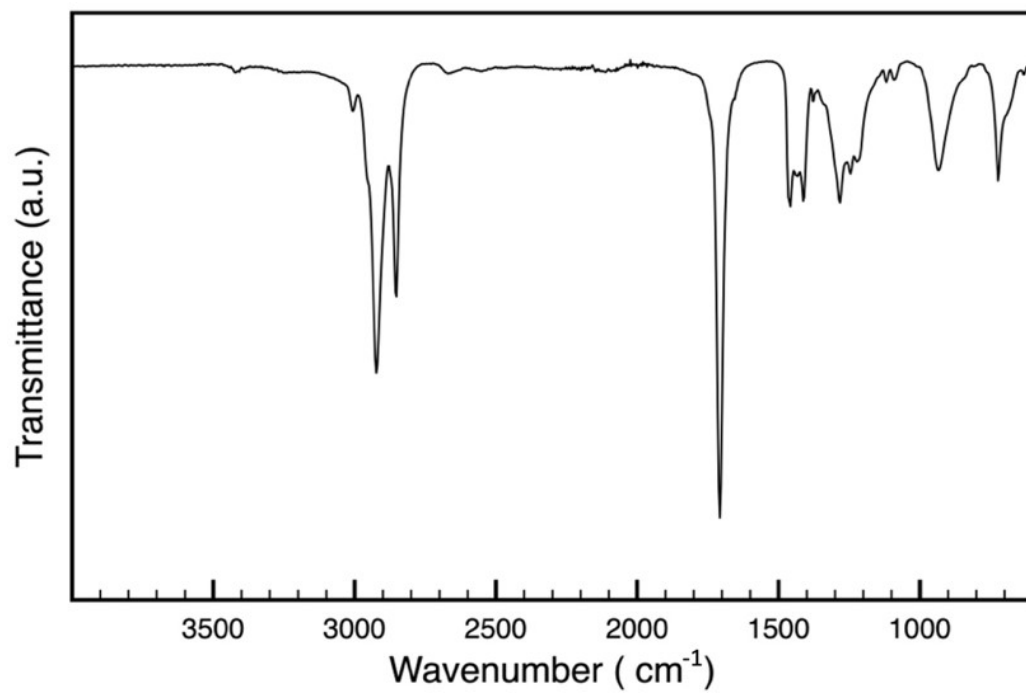

*Figure (S3): FTIR spectrum of oleic acid.*

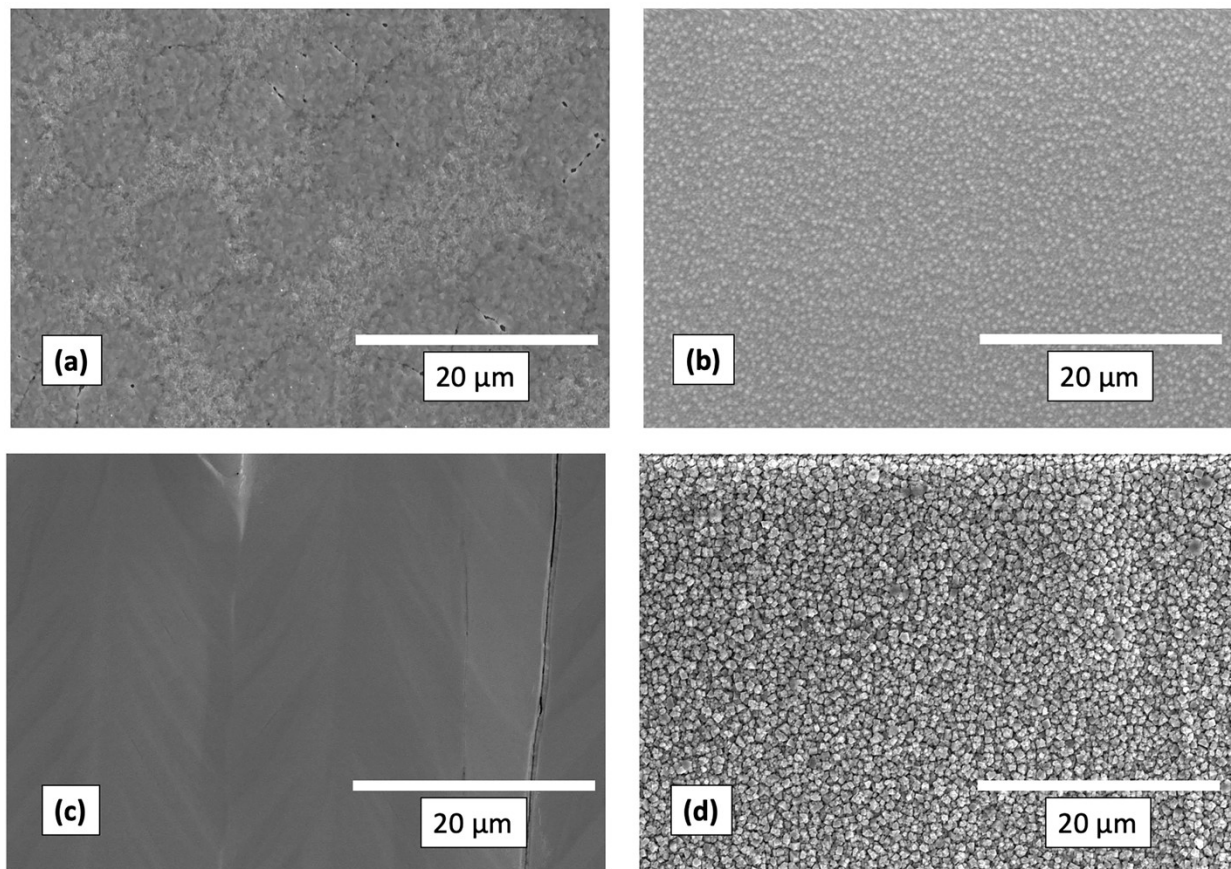

*Figure (S4): SEM images (2.5k magnification) of  $\text{MAPbI}_3$  films prepared via different deposition methods: (a) SC-1, (b) SC-2, (c) BC-1, (d) BC-2.*

\

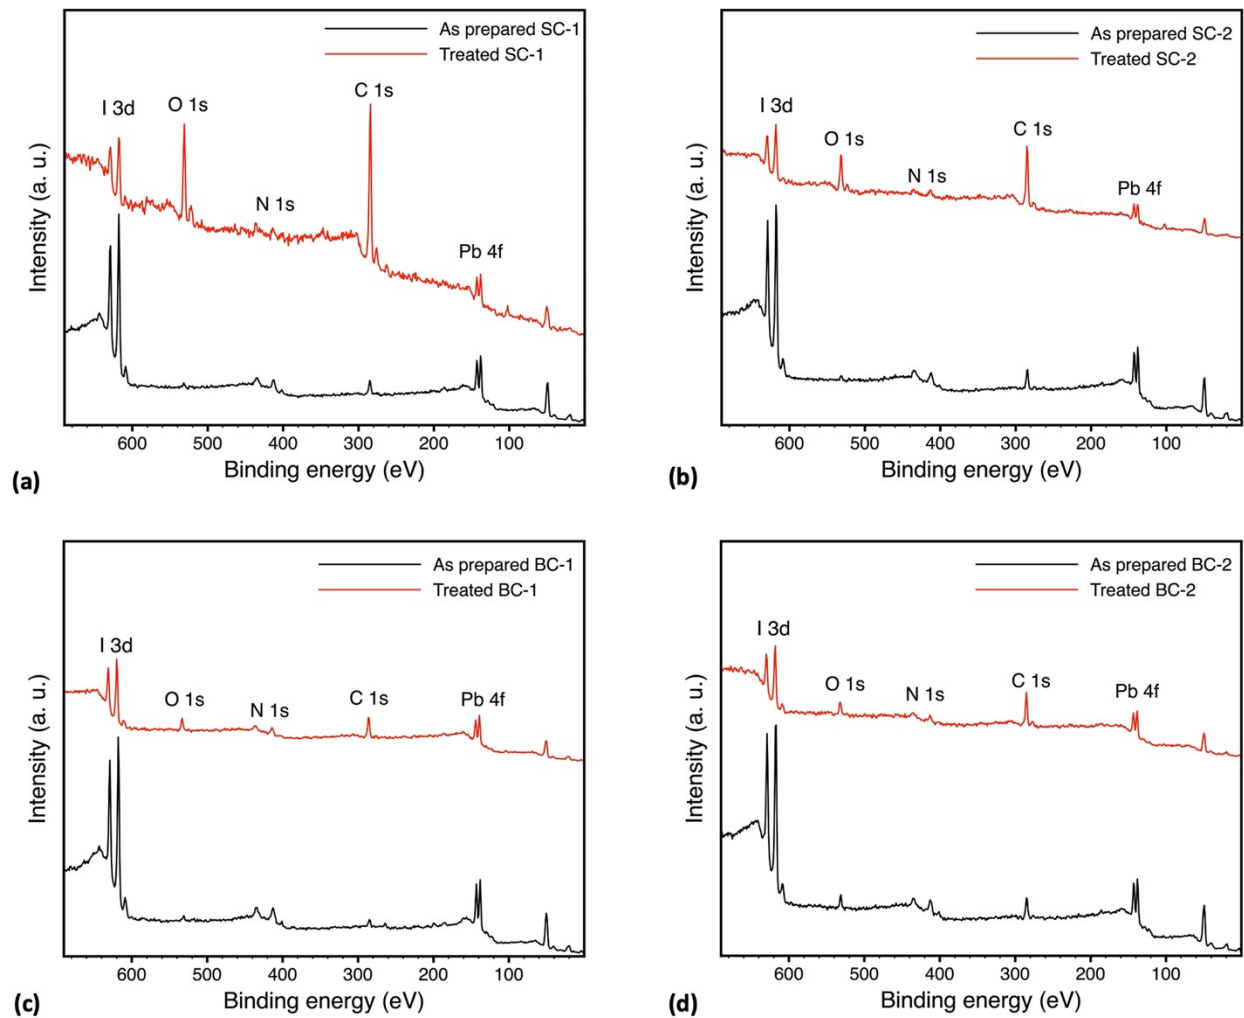

Figure (S5): XPS survey spectra of MAPbI<sub>3</sub> films prepared via different deposition methods: (a) SC-1, (b) SC-2, (c) BC-1, (d) BC-2.

**Reference:**

1. Abdelmageed, G. *et al.* Improved Stability of Organometal Halide Perovskite Films and Solar Cells toward Humidity via Surface Passivation with Oleic Acid. *ACS Appl. Energy Mater.* **1**, 387–392 (2018).
